# Supplementary material
Source: Springer Nature journal article supplement (https://www.springermedizin.de/resource/supplementary/12885_2011_2964_MOESM4_ESM.pdf/9462330)

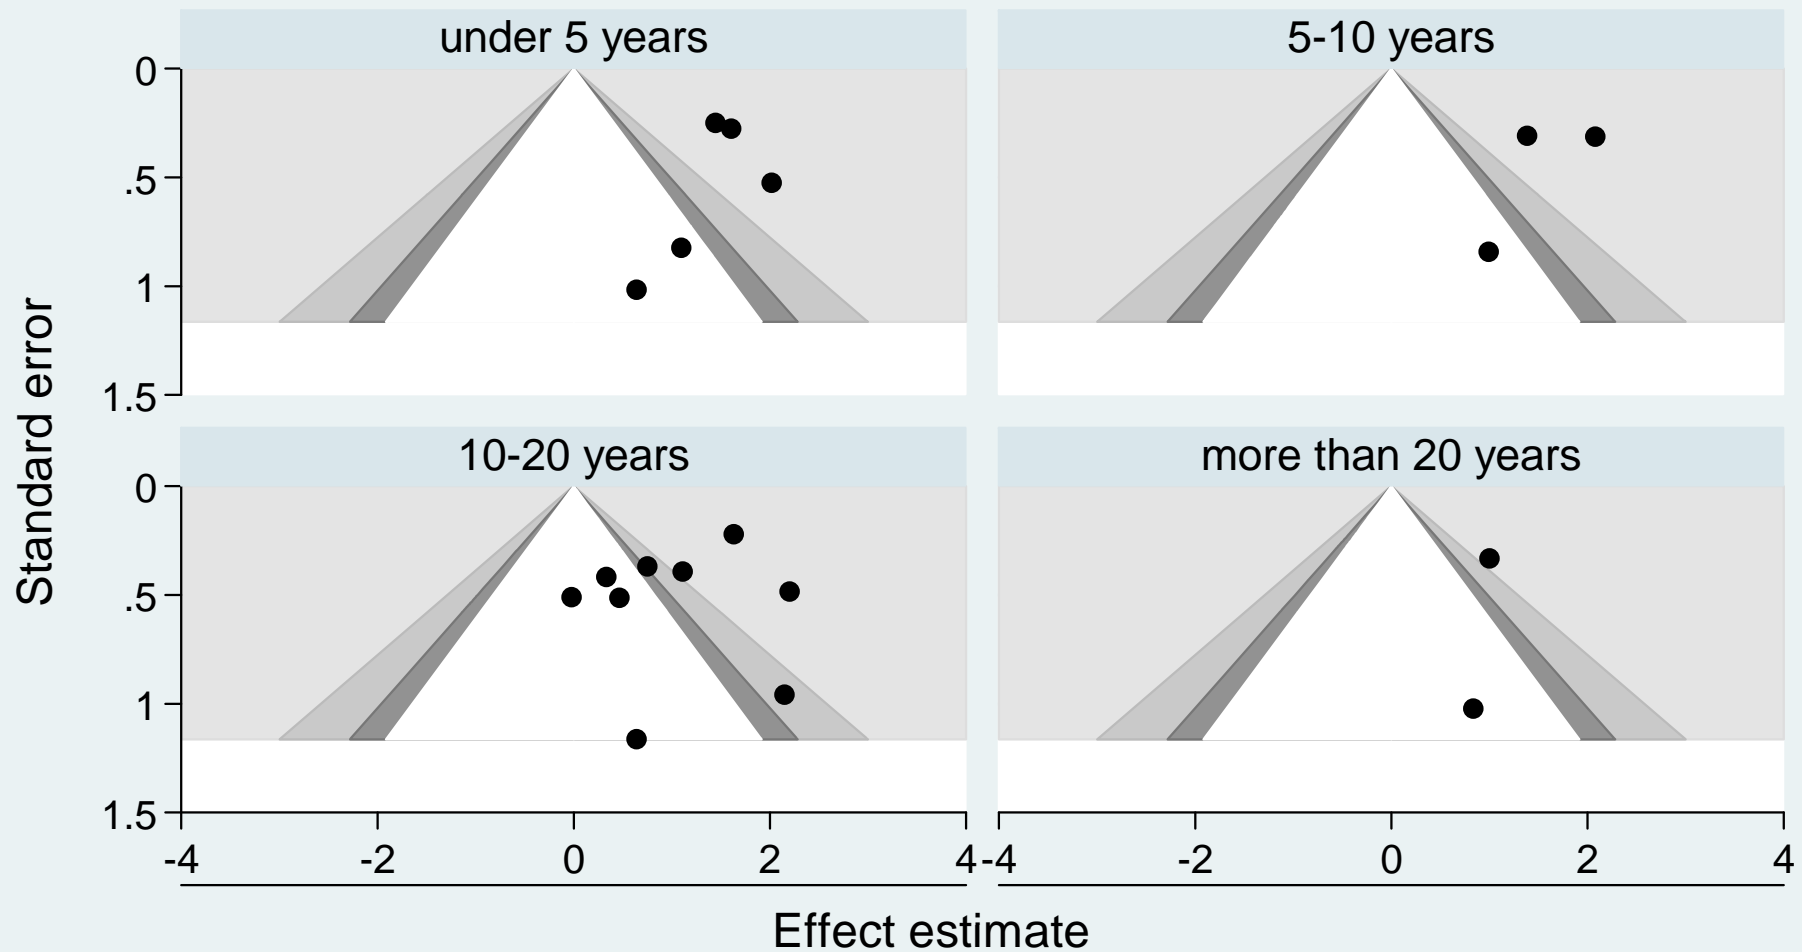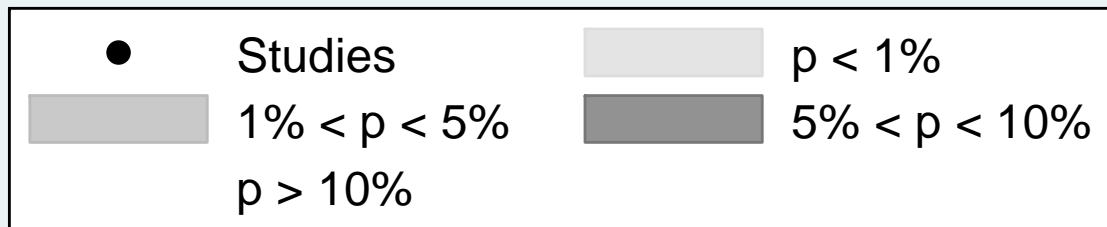

Graphs by timesincequit

Supplement: MOESM4 [file 9462330]
